# Supplementary material for: Design of ternary additive for organic photovoltaics: a cautionary tale
Source: Royal Society of Chemistry journal article supplement (doi:10.1039/d2ra00540a), 2022-01-01
Supplement: d2ra00540a1.pdf [file d2ra00540a1.pdf]

## Design of Ternary Additive for Organic Photovoltaics: A Cautionary Tail

*Chithiravel Sundaresan,<sup>1,2</sup> Pierre Jossse<sup>1,3</sup>, Mário C. Vebber<sup>1</sup>, Jaclyn Brusso<sup>3</sup>, Jianping Lu<sup>2</sup>, Ye Tao<sup>2</sup>, Salima Alem<sup>2,\*</sup>, and Benoît H. Lessard<sup>1,4\*</sup>*

<sup>1</sup>Department of Chemical & Biological Engineering, University of Ottawa, 161 Louis Pasteur, Ottawa, ON, Canada, K1N 6N5

<sup>2</sup>Advanced Electronics and Photonics Research Centre, National Research Council of Canada, Ottawa, ON, K1A 0R6, Canada

<sup>3</sup>Department of Chemistry and Biomolecular Science, University of Ottawa, 150 Louis-Pasteur Pvt, Ottawa, ON, Canada, K1N 6N5

<sup>4</sup>School of Electrical Engineering and Computer Science, University of Ottawa, 800 King Edward Ave. Ottawa, ON, Canada, K1N 6N5

\*corresponding authors: benoit.lessard@uottawa.ca (B.H.L) and [salima.alem@nrc-cnrc.gc.ca](mailto:salima.alem@nrc-cnrc.gc.ca) (S.A.)

## Electronic supporting Information

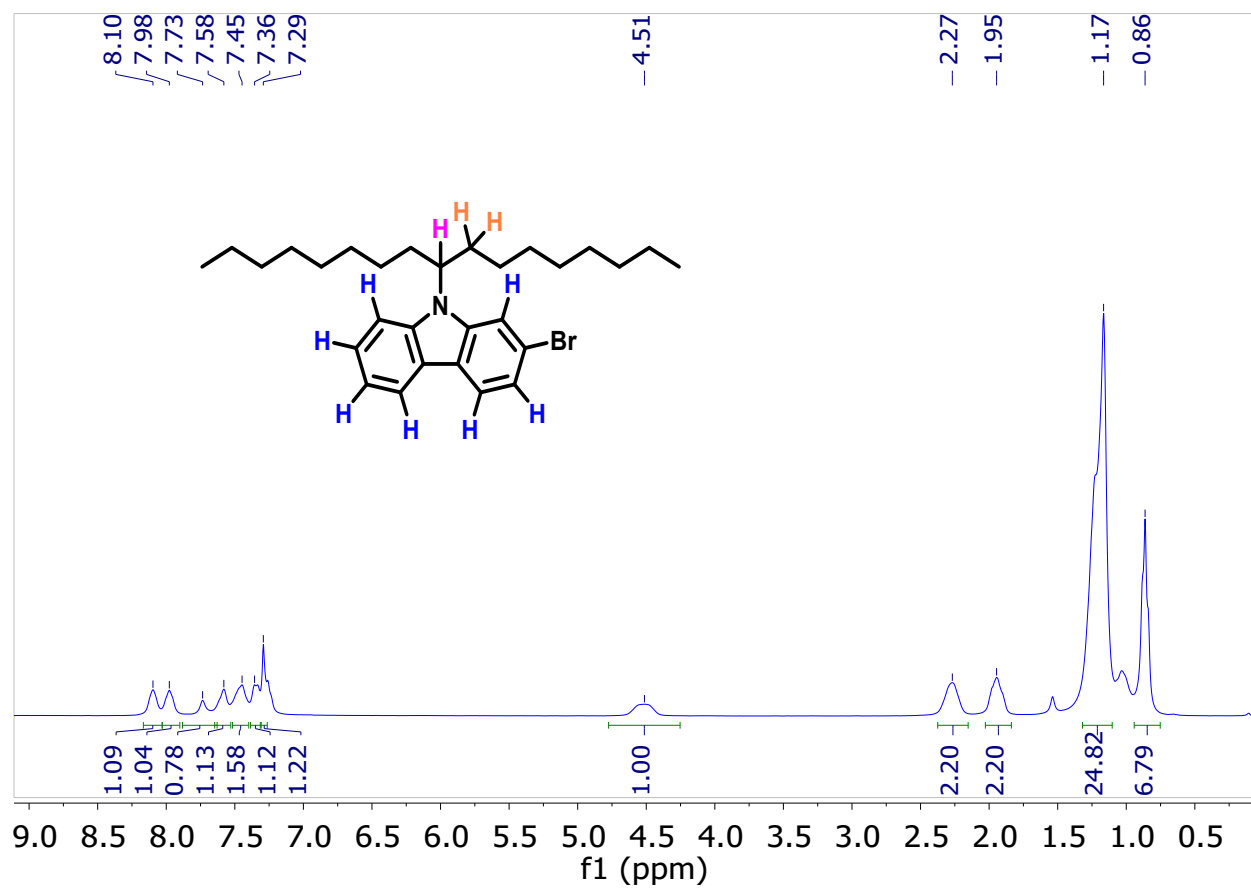

**Figure S1.** <sup>1</sup>H NMR spectra recorded at 300K in CDCl<sub>3</sub>

<sup>1</sup>H NMR (δ, CDCl<sub>3</sub>, RT, 300 MHz): 8.10 (m, 1H), 7.98 (m, 1H), 7.73 (m, 1H), 7.58 (m, 1H), 7.45 (m, 1H), 7.36 (m, 1H), 7.29 (m, 1H), 4.51 (m, 1H), 2.27 (m, 2H), 1.95 (m, 2H), 1.17 (m, 24H), 0.86 (t, 6H).

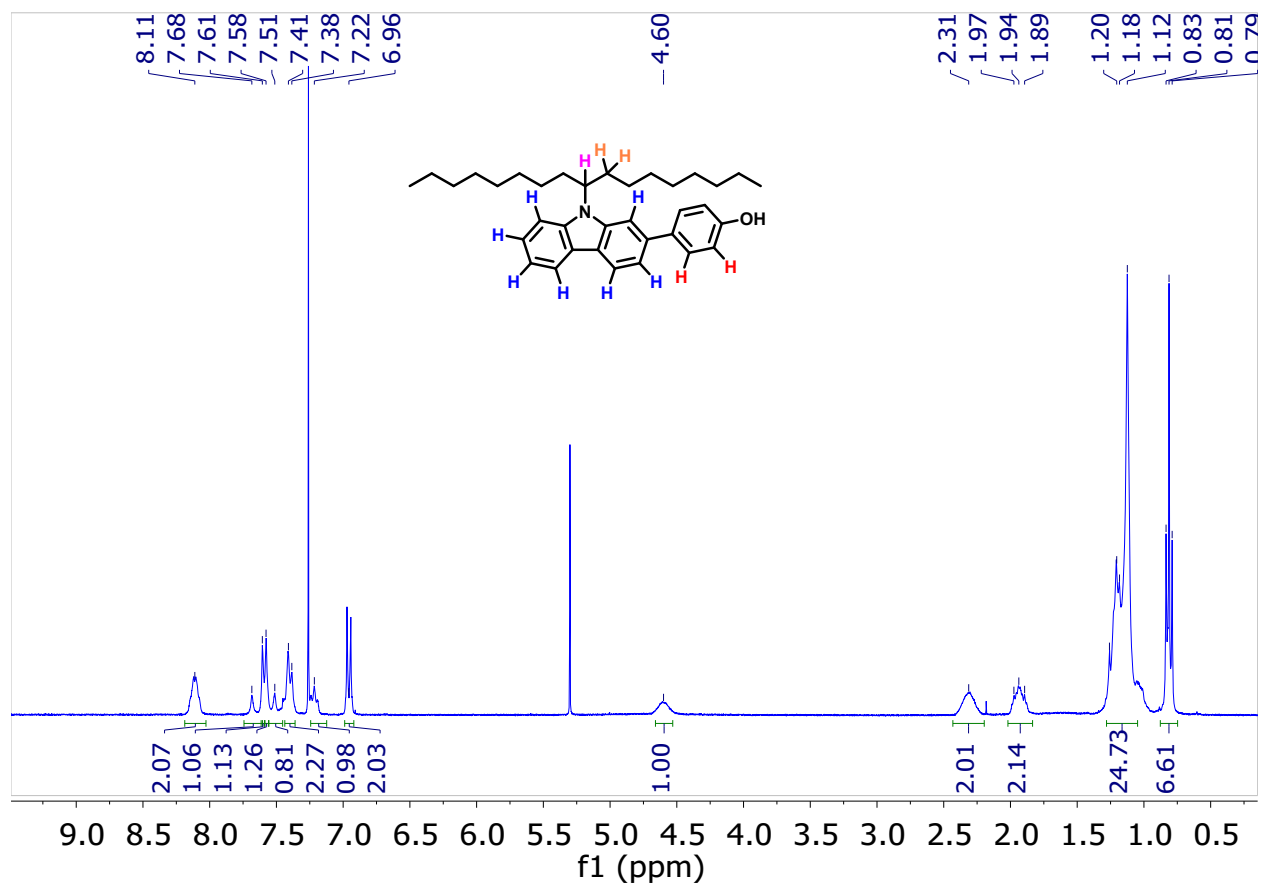

**Figure S2.**  $^1\text{H}$  NMR spectra recorded at 300K in  $\text{CDCl}_3$

$^1\text{H}$  NMR ( $\delta$ ,  $\text{CDCl}_3$ , RT, 300 MHz): 8.11 (dd, 2H), 7.68 (m, 1H), 7.61 (m, 1H), 7.58 (m, 1H), 7.51 (m, 1H), 7.38–7.41 (m, 2H), 7.22 (m, 1H), 6.96 (dt, 2H), 4.60 (m, 1H), 2.31 (m, 2H), 1.94 (m, 2H), 1.12–1.26 (m, 24H), 0.83–0.79 (t, 6H).



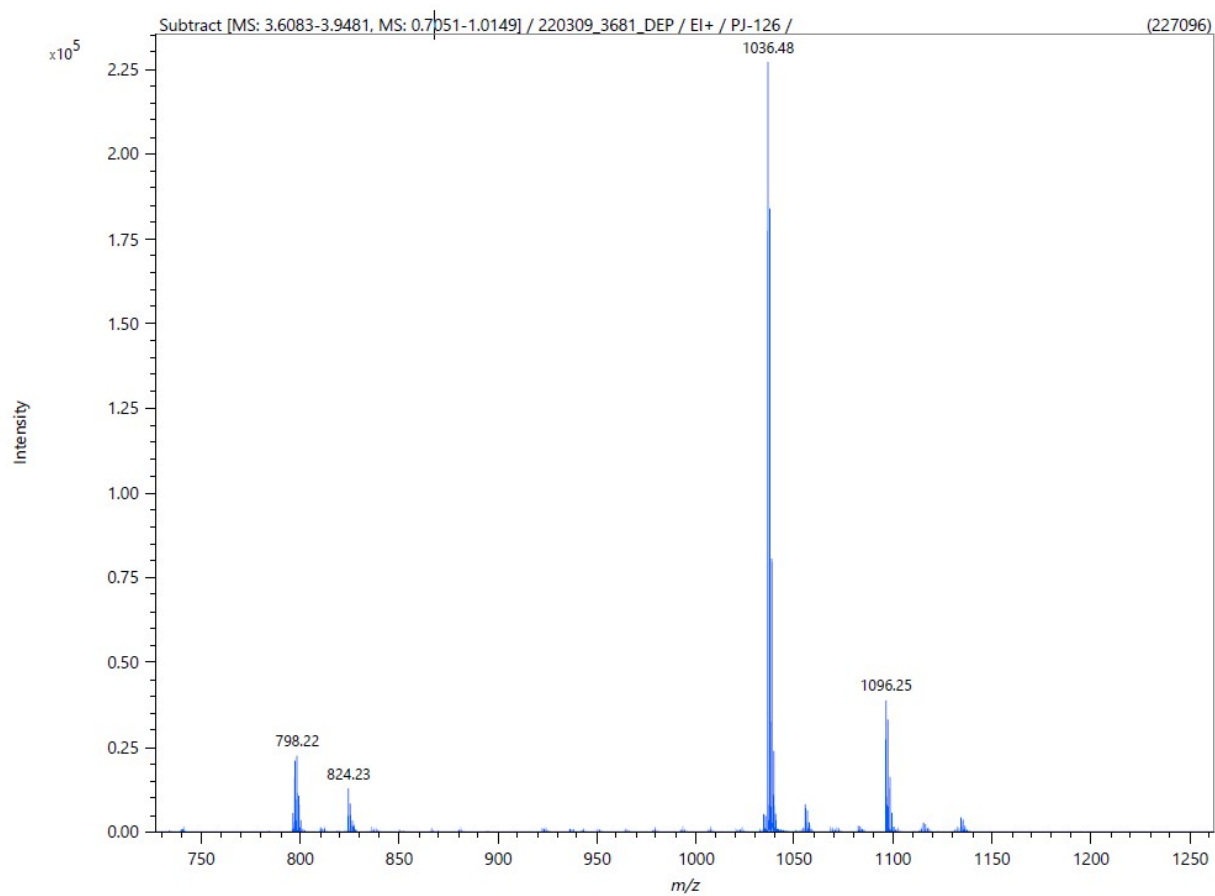

Figure S4. Electrospray ionization (ESI) Mass spectra plot of (CBzPho)<sub>2</sub>-SiPc

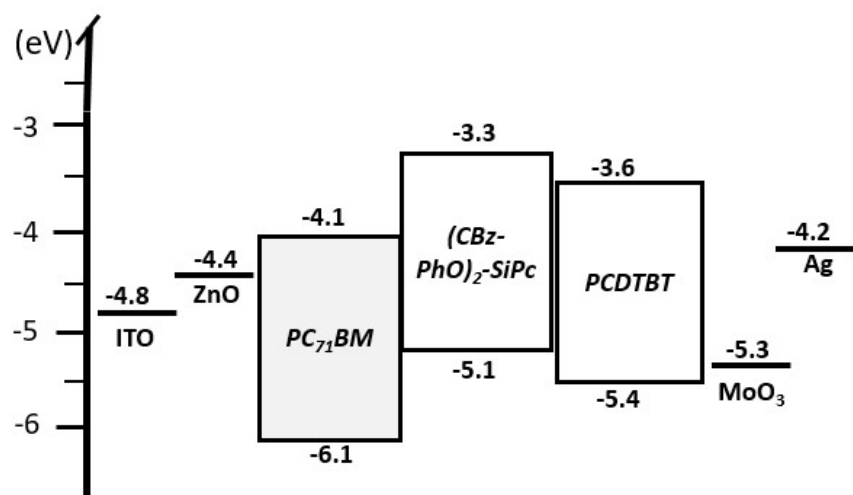

Figure S5. Energy level diagram of all materials used in ternary devices.

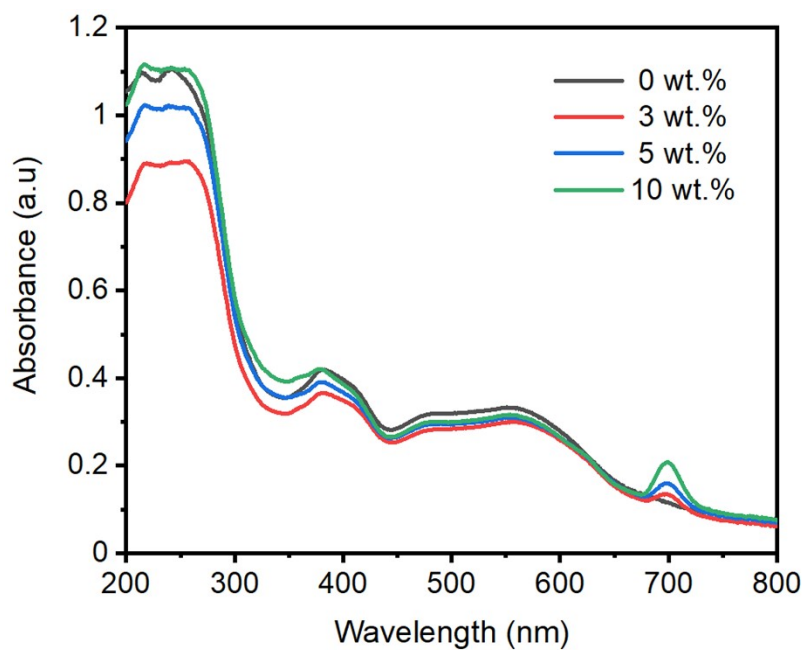

Figure S6. UV-vis absorption spectra of PCDTBT:  $PC_{71}BM$  binary film and ternary films with different

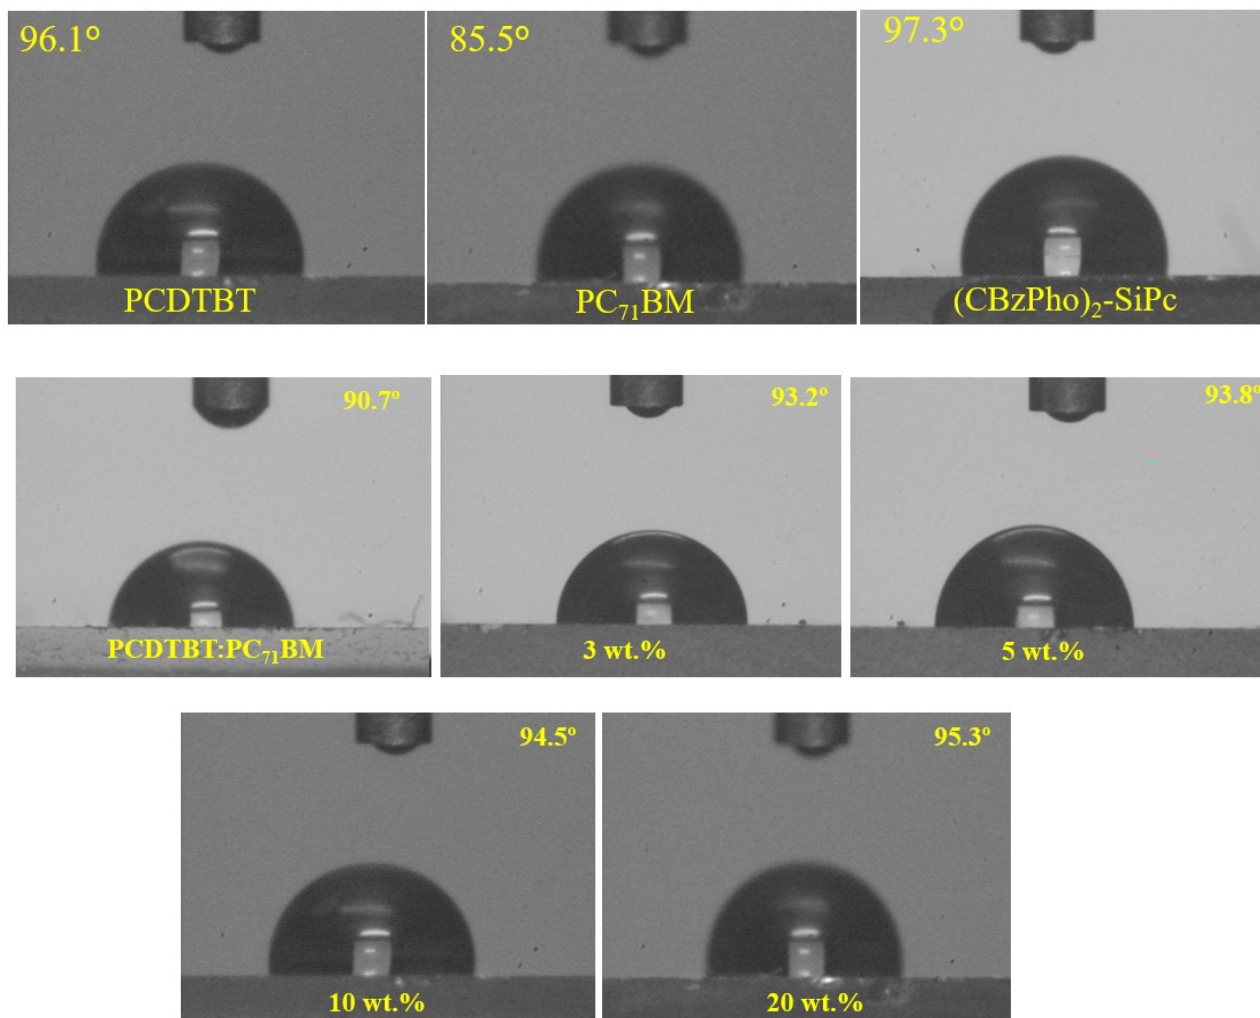

Figure S7: Water contact angle images of pristine films, binary and ternary films with different content of (CBzPho)<sub>2</sub>-SiPc varies from 0 to 20wt.%.

**Table S1. Summary of H<sub>2</sub>O Contact Angle Measurements on ternary Films <sup>(a)</sup>**

| <b>Films <sup>(a)</sup></b> | <b>Water Contact Angle<br/>(Deg)</b> | <b>Surface Energy<br/>(N mm<sup>-1</sup>)<sup>(b)</sup></b> |
|-----------------------------|--------------------------------------|-------------------------------------------------------------|
| PCDTBT:PC71BM               | 90.7 (± 0.6)                         | 28.1 (± 0.7)                                                |
| 3 wt.% (CBzPho)2-SiPc       | 93.2 (± 0.4)                         | 26.5 (± 0.7)                                                |
| 5 wt.% (CBzPho)2-SiPc       | 93.8 (± 0.7)                         | 26.1 (± 0.5)                                                |
| 10 wt.% (CBzPho)2-SiPc      | 94.5 (± 0.6)                         | 25.7 (± 0.4)                                                |
| 20 wt.% (CBzPho)2-SiPc      | 95.3 (± 0.5)                         | 25.4 (± 0.3)                                                |



**Table S2:** Photovoltaic performance of ternary PCDTBT: PC<sub>71</sub>BM OPVs prepared by blade coating with various (CBzPho)<sub>2</sub>-SiPc loadings.

| PCDTBT:PC <sub>71</sub><br>BM:<br>(CBzPho) <sub>2</sub> -SiPc | (CBzPho) <sub>2</sub> -SiPc<br>Wt. % <sup>(a)</sup> | Calibrated J <sub>sc</sub><br>from EQE<br>(mA/cm <sup>2</sup> ) <sup>b</sup> | V <sub>oc</sub> (V) | FF (%)      | Calibrated<br>PCE (%) |
|---------------------------------------------------------------|-----------------------------------------------------|------------------------------------------------------------------------------|---------------------|-------------|-----------------------|
| 1:3:0                                                         | 0                                                   | 9.4 (±0.1)                                                                   | 0.842 (±0.001)      | 56.6 (±0.5) | 4.5 (±0.1)            |
| 1:3:0.12                                                      | 3                                                   | 9.2 (±0.1)                                                                   | 0.835 (±0.001)      | 53.8 (±0.7) | 4.1 (±0.1)            |
| 1:3:0.2                                                       | 5                                                   | 9.1 (±0.1)                                                                   | 0.842 (±0.001)      | 51.8 (±0.4) | 3.9 (±0.1)            |
| 1:3:0.4                                                       | 10                                                  | 9.0 (±0.1)                                                                   | 0.845 (±0.002)      | 49.6 (±0.2) | 3.8 (±0.1)            |
| 1:3:0.6                                                       | 20                                                  | 8.4 (±0.3)                                                                   | 0.862 (±0.002)      | 48.6 (±0.2) | 3.5 (±0.1)            |

All OPV devices were characterized under AM 1.5G, 100 mWcm<sup>-2</sup>. Device areas is 1 cm<sup>2</sup>. All values are average of more than 5 devices and the values in parentheses is the standard deviation. Blade coating process were performed in air. The base temperature for the blade process is 45 °C. <sup>(a)</sup>(CBzPho)<sub>2</sub>-SiPc mass ratio in the blend with respect to total mass of PCDTBT: PC<sub>71</sub>BM. <sup>(b)</sup>Current density (Jsc) calculated from integration wavelength of EQE curve.

### ***Charge generation and recombination dynamics***

In order to further investigate the exciton generation and dissociation process of the binary and ternary devices, the exciton generation rates ( $G_{max}$ ) and charge dissociation probabilities ( $P_{diss}$ ) were analysed by characterization of photocurrent density ( $J_{ph}$ ) against the effective voltage ( $V_{eff}$ ), as shown in Figure S8.  $J_{ph}$  is defined as  $J_{light} - J_{dark}$ , where  $J_{light}$  and  $J_{dark}$  are the photocurrent densities under light illumination and in the dark, respectively. And  $V_{eff} = V_0 - V_{appl}$ , where  $V_0$  is the voltage at which  $J_{ph} = 0$ , and  $V_{appl}$  is the applied bias.[1] The photogenerated excitons were almost dissociated into free charge carriers when  $V_{eff}$  reached  $<2$  V, and thus  $J_{ph}$  could reach saturation ( $J_{sat}$ ). We adopted the ratio of  $J_{ph}/J_{sat}$  to evaluate the exciton dissociation probability ( $P_{diss}$ ) in the devices.[2] Assuming that all of the photogenerated excitons are dissociated and contributed to the current in the saturated regime due to sufficiently high electric field, the values of  $G_{max}$  can be obtained by  $J_{sat} = qLG_{max}$ , where  $q$  is the elementary charge and  $L$  is the thickness of the binary or ternary organic layer and  $J_{sat}$  is saturation current density at elevated  $V_{eff}$  (3.8V). Table S3 shows the values obtained for various (CBzPho)<sub>2</sub>-SiPc weight ratio loading. As expected the value of  $G_{max}$  for various addition of (CBzPho)<sub>2</sub>-SiPc are reduces compare to the baseline devices due to the high density of recombination sites as replicated in the performance of J-V curve. Under the short-circuit conditions, the ( $P_{diss}$ ) values were 85.4%, 80.2%, 80.5%, and 81.5% for the devices with 0, 3, 5, and 10wt.% (CBzPho)<sub>2</sub>-SiPc, respectively.

The dynamics of recombination in PCDTBT:PC<sub>71</sub>BM:(CBzPho)<sub>2</sub>-SiPc devices were investigated through the analysis of  $J_{SC}$  and  $V_{OC}$  under various light intensities ( $P_{light}$ ). The J-V characterizations of binary and ternary devices with different content of (CBzPho)<sub>2</sub>-SiPc as shown in the Figure S9. The plot  $\ln(J_{SC})$  versus  $\ln(P_{light})$  provides information on the degree of bimolecular recombination. The slope ( $\alpha$ ) implies close to unity means, negligible bimolecular recombination associated with the OPV devices.[3], [4] all the ternary devices slope ( $\alpha$ ) values

shows higher values than the baseline devices. (Figure S10a). In addition trap assisted monomolecular recombination extracted for the binary and ternary devices from the  $(V_{oc})$  versus Natural logarithmic  $(P_{light})$  plot. Typically, a slope (S) equal to  $kT/q$  suggests the absence of bimolecular recombination, whereas an S ranging between 1 and 2 indicates the presence of monomolecular recombination and trap assisted recombination losses.[5], [6] It can be observed that the higher Slope (S) value of the PCDTBT: PC<sub>71</sub>BM: (CBzPho)2-SiPc indicates (Figure S10b) that adding a small concentration of (CBzPho)2-SiPc results in a higher trap-assisted recombination associated, resulting in lower  $J_{SC}$  and FF as compared to those of the binary system.

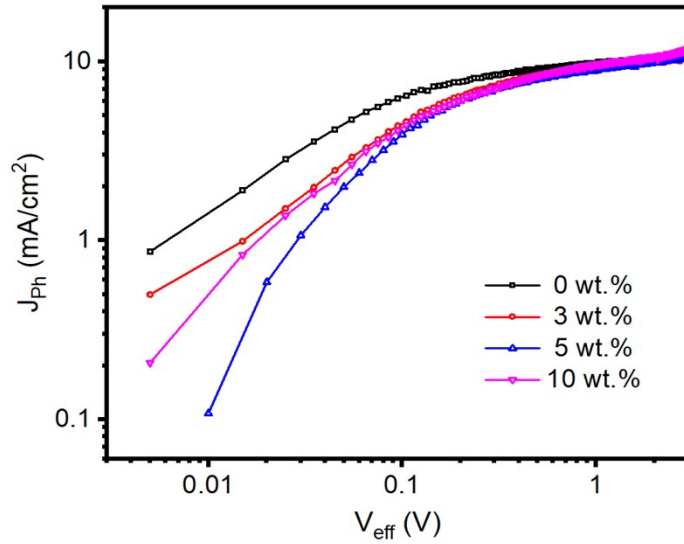

Figure S8. Photocurrent density ( $J_{ph}$ ) as a function of the effective voltage ( $V_{eff}$ ) of blade-coated PCDTBT:PC<sub>71</sub>BM:(CBzPho)2-SiPc devices with various (CBzPho)2-SiPc loadings.

**Table S3:** Charge generation parameters of blade coated PCDTBT:PC<sub>71</sub>BM:(CBzPho)<sub>2</sub>-SiPc ternary devices with different (CBzPho)<sub>2</sub>-SiPc contents

| (CBzPho) <sub>2</sub> -SiPc<br>Wt. % | $J_{sat}$ (mA/cm <sup>2</sup> ) | $G_{max}$ (cm <sup>-3</sup> s <sup>-1</sup> ) | $P_{diss}$ (%) |
|--------------------------------------|---------------------------------|-----------------------------------------------|----------------|
| 0                                    | 11.8 (±0.1)                     | 8.87 x 10 <sup>21</sup>                       | 85.4           |
| 3                                    | 11.6 (±0.1)                     | 8.72 x 10 <sup>21</sup>                       | 80.2           |
| 5                                    | 12.5 (±0.2)                     | 9.20 x 10 <sup>21</sup>                       | 80.5           |
| 10                                   | 11.5 (±0.1)                     | 8.65 x 10 <sup>21</sup>                       | 81.5           |

$J_{sat}$  is the saturation current density,  $P_{diss}$  is the charge dissociation probability,  $G_{max}$  is the charge carrier generation.

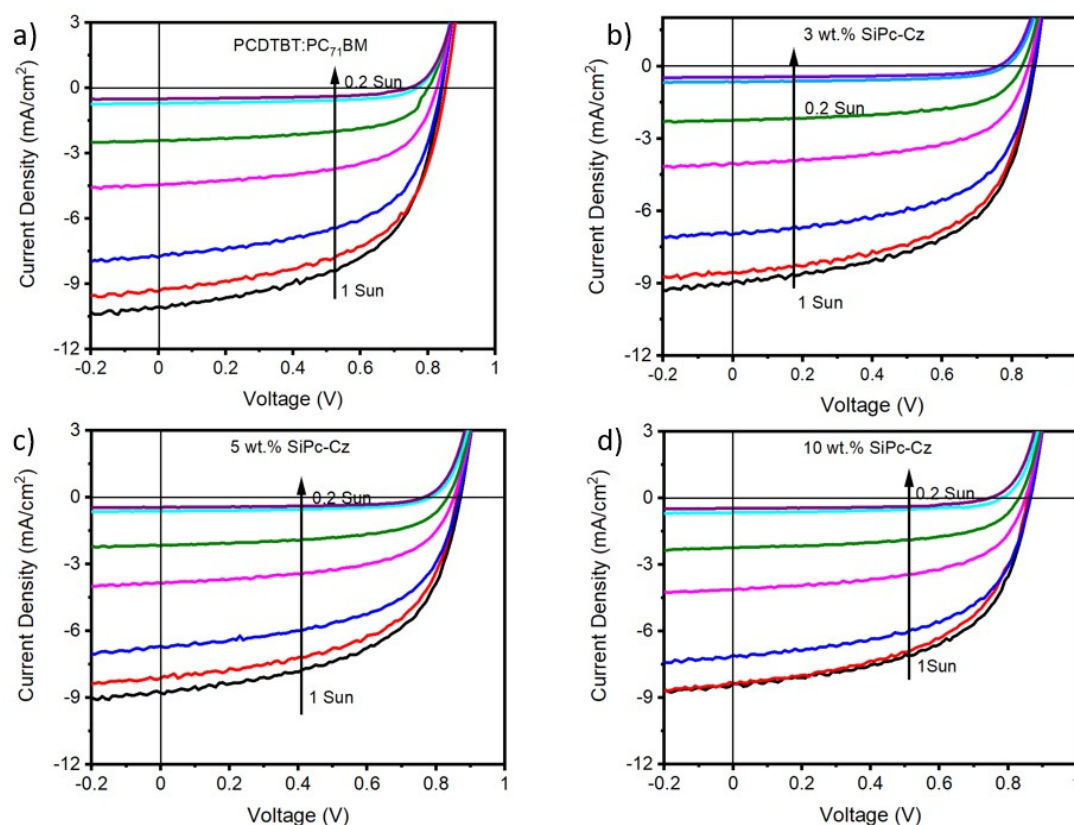

Figure S9. Light intensity dependence J-V curve of PCDTBT: PC<sub>71</sub>BM devices with various (CBzPho)<sub>2</sub>-SiPc loadings a) 0 wt.% b) 3 wt.% c) 5 wt.% and d) 10wt.% respectively. J-V curve measured under various light intensities ranging from 100 to 2 mW/cm<sup>2</sup>.

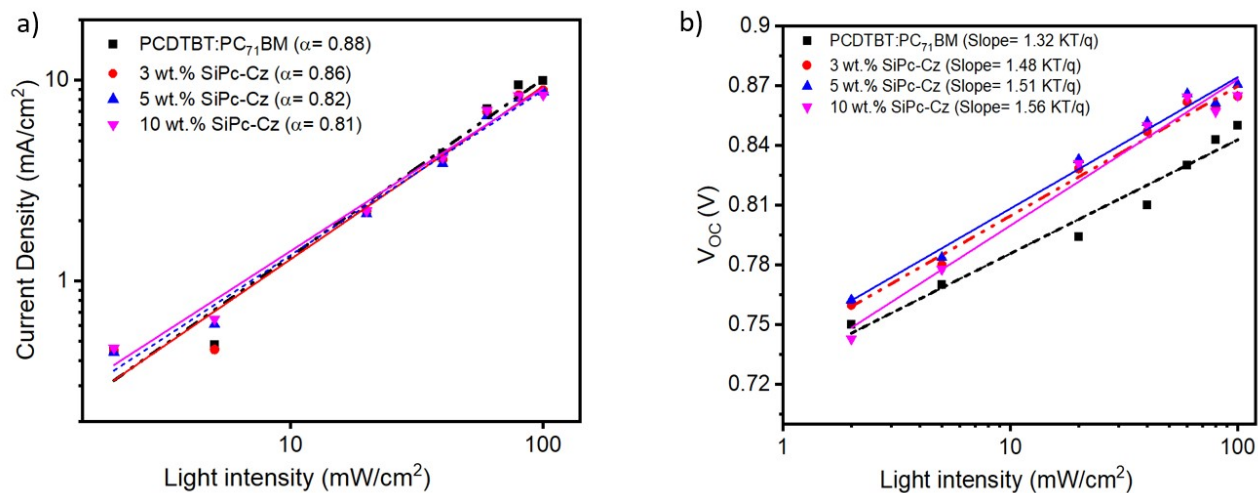

Figure S10. Light intensity dependence short circuit density and (a) open circuit voltage (b) of blade-coated PCDTBT: PC<sub>71</sub>BM :(CBzPho)<sub>2</sub>-SiPc devices with various (CBzPho)<sub>2</sub>-SiPc loadings.

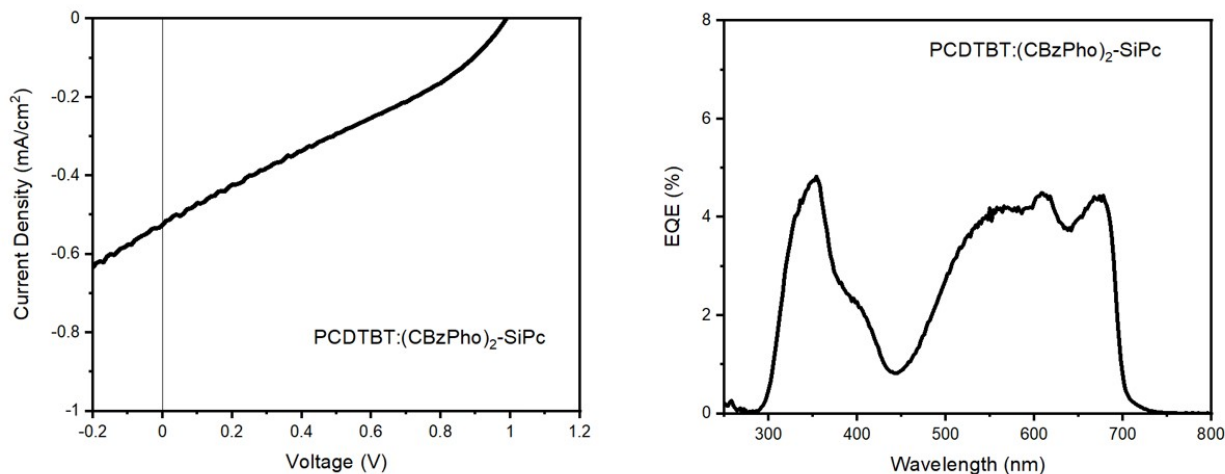

Figure S11. (a) J-V characteristics of PCDTBT: (CBzPho)<sub>2</sub>-SiPc Binary BHJ OPV devices fabricated by blade coating on ITO/PET substrates, ( $V_{oc}$  0.98 V,  $J_{sc}$  0.56 mA/cm<sup>2</sup> FF 0.28 and PCE~ 0.15 %), (b) corresponding EQE curves

Table S4. Energy levels of silicon phthalocyanine and Silicon Naphthalocyanine derivatives incorporated into OPV devices

| SiPc derivatives                       | HOMO (eV) | LUMO (eV) | Ref.      |
|----------------------------------------|-----------|-----------|-----------|
| (CBzPho) <sub>2</sub> -SiPc            | -5.1      | -3.3      | This Work |
| (HxN <sub>3</sub> ) <sub>2</sub> -SiPc | -5.4      | -3.6      | [7]       |
| (3XS) <sub>2</sub> -SiPc               | -5.3      | -3.4      | [8][9]    |
| X <sub>2</sub> -SiPc                   | -5.3      | -3.5      | [10]      |
| (XF) <sub>2</sub> -SiPc                | -5.9      | -4.0      | [11]      |
| Carboxyl-SiPc                          | -5.4      | -3.6      | [12]      |
| (Pys-SiPc)                             | -5.3      | -3.6      | [13]      |
| (3XS-SiNc)                             | -4.8      | -3.4      | [14]      |

## References:

- [1] P. Bi and X. Hao, “Versatile Ternary Approach for Novel Organic Solar Cells: A Review,” *Sol. RRL*, vol. 3, no. 1, pp. 1–34, 2019, doi: 10.1002/solr.201800263.
- [2] F. Paquin, J. Rivnay, A. Salleo, N. Stingelin, and C. Silva, “Multi-phase semicrystalline microstructures drive exciton dissociation in neat plastic semiconductors,” *J. Mater. Chem. C*, vol. 3, no. 207890, pp. 10715–10722, 2015, doi: 10.1039/b000000x.
- [3] A. K. K. Kyaw *et al.*, “Intensity dependence of current-voltage characteristics and recombination in high-efficiency solution-processed small-molecule solar cells,” *ACS Nano*, vol. 7, no. 5, pp. 4569–4577, 2013, doi: 10.1021/nn401267s.
- [4] D. Credgington, F. C. Jamieson, B. Walker, T. Q. Nguyen, and J. R. Durrant, “Quantification of geminate and non-geminate recombination losses within a solution-processed small-molecule bulk heterojunction solar cell,” *Adv. Mater.*, vol. 24, no. 16, pp. 2135–2141, 2012, doi: 10.1002/adma.201104738.
- [5] L. Xiao *et al.*, “Multiple Roles of a Non-fullerene Acceptor Contribute Synergistically for High-Efficiency Ternary Organic Photovoltaics,” *Joule*, vol. 2, no. 10, pp. 2154–2166, 2018, doi: 10.1016/j.joule.2018.08.002.
- [6] L. J. A. Koster, M. Kemerink, M. M. Wienk, K. Maturová, and R. A. J. Janssen, “Quantifying bimolecular recombination losses in organic bulk heterojunction solar cells,” *Adv. Mater.*, vol. 23, no. 14, pp. 1670–1674, 2011, doi: 10.1002/adma.201004311.
- [7] T. M. Grant, T. Gorisse, O. Dautel, G. Wantz, and B. H. Lessard, “Multifunctional ternary additive in bulk heterojunction OPV: Increased device performance and stability,” *J. Mater. Chem. A*, vol. 5, no. 4, pp. 1581–1587, 2017, doi: 10.1039/c6ta08593h.
- [8] M. T. Dang, T. M. Grant, H. Yan, D. S. Seferos, B. H. Lessard, and T. P. Bender, “Bis(tri-n-alkylsilyl oxide) silicon phthalocyanines: A start to establishing a structure property relationship as both ternary additives and non-fullerene electron acceptors in bulk heterojunction organic photovoltaic devices,” *J. Mater. Chem. A*, vol. 5, no. 24, pp. 12168–12182, 2017, doi: 10.1039/c6ta10739g.
- [9] S. Honda, S. Yokoya, H. Ohkita, H. Benten, and S. Ito, “Light-harvesting mechanism in polymer/fullerene/dye ternary blends studied by transient absorption spectroscopy,” *J. Phys. Chem. C*, vol. 115, no. 22, pp. 11306–11317, 2011, doi: 10.1021/jp201742v.
- [10] T. M. Grant and J. L. Brusso, “Bis(trialkylsilyl oxide) Silicon Phthalocyanines: Understanding the Role of Solubility in Device Performance as Ternary Additives in

Organic Photovoltaics’,” 2020, doi: 10.1021/acs.langmuir.9b03772.

- [11] T. M. Grant, R. White, E. Thibau, Z. Lu, and T. P. Bender, “Donor / Acceptor Properties of Fluorophenoxy Silicon Phthalocyanines within Electronic Supporting Information .,” 2015.
- [12] E. Zysman-Colman *et al.*, “Solution-Processable Silicon Phthalocyanines in Electroluminescent and Photovoltaic Devices,” *ACS Appl. Mater. Interfaces*, vol. 8, no. 14, pp. 9247–9253, 2016, doi: 10.1021/acsami.5b12408.
- [13] L. Ke *et al.*, “A Series of Pyrene-Substituted Silicon Phthalocyanines as Near-IR Sensitizers in Organic Ternary Solar Cells,” *Adv. Energy Mater.*, vol. 6, no. 7, pp. 1–13, 2016, doi: 10.1002/aenm.201502355.
- [14] B. Lim, J. T. Bloking, A. Ponc, M. D. McGehee, and A. Sellinger, “Ternary bulk heterojunction solar cells: Addition of soluble NIR dyes for photocurrent generation beyond 800 nm,” *ACS Appl. Mater. Interfaces*, vol. 6, no. 9, pp. 6905–6913, 2014, doi: 10.1021/am5007172.
